# Supplementary material for: Study Design of VESUTO®: Efficacy of Tiotropium/Olodaterol on Lung Hyperinflation, Exercise Capacity, and Physical Activity in Japanese Patients with Chronic Obstructive Pulmonary Disease
Source: Springer Nature journal article supplement (doi:10.1007/s12325-017-0554-3), 2017-05-23
Supplement: MOESM1 [file 12309526]

**Supplementary Table S1 Site and IRB list**

| <b>No.</b> | <b>Site name (location)</b>                                                                              | <b>IRB (location)</b>                                          | <b>Approval number (date)</b>         |
|------------|----------------------------------------------------------------------------------------------------------|----------------------------------------------------------------|---------------------------------------|
| 1          | Matsusaka City Hospital<br>(Matsusaka, Mie, Japan)                                                       | <i>same as on the left</i>                                     | (22 Dec 2015)*                        |
| 2          | Kinki University Hospital<br>(Osakasayama, Osaka, Japan)                                                 | <i>same as on the left</i>                                     | 1724<br>(22 Dec 2015)*                |
| 3          | Tosei General Hospital<br>(Seto, Aichi, Japan)                                                           | <i>same as on the left</i>                                     | H271104Ba679+BI1744<br>(24 Nov 2015)* |
| 4          | Hokkaido University Hospital<br>(Sapporo, Hokkaido, Japan)                                               | <i>same as on the left</i>                                     | 15066<br>(15 Dec 2015)                |
| 5          | Tohno Chuo Clinic<br>(Mizunami, Gifu, Japan)                                                             | Shinagawa East One Medical Clinic<br>(Minato-ku, Tokyo, Japan) | (14 Dec 2015)*                        |
| 6          | NHO Ibarakihigashi Hospital<br>(Naka-gun, Ibaraki, Japan)                                                | <i>same as on the left</i>                                     | (18 Dec 2015)*                        |
| 7          | Osaka City University Hospital<br>(Osaka, Osaka, Japan)                                                  | <i>same as on the left</i>                                     | (17 Dec 2015)*                        |
| 8          | Japan Organization of Occupational<br>Health and Safety Tohoku Rosai Hospital<br>(Sendai, Miyagi, Japan) | <i>same as on the left</i>                                     | 15A012a<br>(17 Dec 2015)              |
| 9          | Medical Corporation Koukankai Koukan<br>Clinic (Kawasaki, Kanagawa, Japan)                               | Nihon Koukan Hospital<br>(Kawasaki, Kanagawa, Japan)           | (03 Dec 2015)*                        |
| 10         | Shinjuku Research Park Clinic<br>(Shinjuku-ku, Tokyo, Japan)                                             | Tokyo-Eki Center-building Clinic<br>(Chuo-ku, Tokyo, Japan)    | 427200-20151211<br>(11 Dec 2015)      |
| 11         | Tohoku University Hospital<br>(Sendai, Miyagi, Japan)                                                    | <i>same as on the left</i>                                     | 151031<br>(21 Dec 2015)               |
| 12         | Japan Community Health Care<br>Organization Hokkaido Hospital<br>(Sapporo, Hokkaido, Japan)              | <i>same as on the left</i>                                     | (10 Dec 2015)*                        |
| 13         | Hiramatsu Internal & Respiratory<br>Medicine Clinic (Komaki, Aichi, Japan)                               | Shinagawa East One Medical Clinic<br>(Minato-ku, Tokyo, Japan) | (14 Dec 2015)*                        |
| 14         | Rakuwakai Otowa Hospital<br>(Kyoto, Kyoto, Japan)                                                        | <i>same as on the left</i>                                     | 1509<br>(11 Dec 2015)                 |
| 15         | Kurume University Hospital<br>(Kurume, Fukuoka, Japan)                                                   | <i>same as on the left</i>                                     | 215039<br>(18 Feb 2016)               |
| 16         | K-you Health Care Co. Kirigaoka Tsuda<br>Hospital (Kitakyushu, Fukuoka, Japan)                           | <i>same as on the left</i>                                     | (15 Dec 2015)*                        |
| 17         | Kyoto University Hospital<br>(Kyoto, Kyoto, Japan)                                                       | <i>same as on the left</i>                                     | 1749<br>(13 Jan 2016)                 |
| 18         | Iwate Medical University Hospital<br>(Morioka, Iwate, Japan)                                             | <i>same as on the left</i>                                     | 215041<br>(16 Dec 2015)               |
| 19         | Tokyo Medical University Hachioji<br>Medical Center (Hachioji, Tokyo, Japan)                             | <i>same as on the left</i>                                     | (29 Jan 2016)*                        |
| 20         | Kobe City Hospital Organization Kobe<br>City Medical Center West Hospital<br>(Kobe, Hyogo, Japan)        | <i>same as on the left</i>                                     | (14 Dec 2015)*                        |
| 21         | Kagoshima University Hospital<br>(Kagoshima, Kagoshima, Japan)                                           | <i>same as on the left</i>                                     | 15012<br>(16 Dec 2015)                |

|    |                                                                              |                                                                           |                                  |
|----|------------------------------------------------------------------------------|---------------------------------------------------------------------------|----------------------------------|
| 22 | Respiratory Care Clinic, Nippon Medical School<br>(Chiyoda-ku, Tokyo, Japan) | Nihon Medical School<br>(Bunkyo-ku, Tokyo, Japan)                         | 127024<br>(08 Jan 2016)          |
| 23 | NHO Wakayama Hospital<br>(Hidaka-gun, Wakayama, Japan)                       | <i>same as on the left</i>                                                | 201502<br>(11 Dec 2015)          |
| 24 | KKR Sapporo Medical Center<br>(Sapporo, Hokkaido, Japan)                     | <i>same as on the left</i>                                                | (04 Jan 2016)*                   |
| 25 | Kishiwada City Hospital<br>(Kishiwada, Osaka, Japan)                         | <i>same as on the left</i>                                                | (19 Jan 2016)*                   |
| 26 | Nihon University Itabashi Hospital<br>(Itabashi-ku, Tokyo, Japan)            | <i>same as on the left</i>                                                | 2712-1448<br>(18 Dec 2015)       |
| 27 | Shin-yurigaoka General Hospital<br>(Kawasaki, Kanagawa, Japan)               | Koyasu Neurosurgical Clinic<br>(Yokohama, Kanagawa, Japan)                | (25 Jan 2016)*                   |
| 28 | Yao Tokushukai General Hospital<br>(Yao, Osaka, Japan)                       | Tokushukai Group Institutional Review Board<br>(Chiyoda-ku, Tokyo, Japan) | 004-15-02<br>(18 Dec 2015)       |
| 29 | Kobe City Medical Center General Hospital<br>(Kobe, Hyogo, Japan)            | <i>same as on the left</i>                                                | 15-25<br>(15 Dec 2015)           |
| 30 | Nishi Fukuoka Hospital<br>(Fukuoka, Fukuoka, Japan)                          | <i>same as on the left</i>                                                | (17 Dec 2015)*                   |
| 31 | Uji Tokushukai Medical Center<br>(Uji, Kyoto, Japan)                         | Tokushukai Group Institutional Review Board<br>(Chiyoda-ku, Tokyo, Japan) | 007-15-12<br>(18 Dec 2015)       |
| 32 | Juntendo University Hospital<br>(Bunkyo-ku, Tokyo, Japan)                    | <i>same as on the left</i>                                                | 2015-022<br>(25 Dec 2015)        |
| 33 | Showa University Hospital<br>(Shinagawa-ku, Tokyo, Japan)                    | <i>same as on the left</i>                                                | 1511022(201501)<br>(08 Jan 2016) |
| 34 | Sakaide City Hospital<br>(Sakaide, Kagawa, Japan)                            | <i>same as on the left</i>                                                | (22 Jan 2016)*                   |
| 35 | Showa University Fujigaoka Hospital<br>(Yokohama, Kanagawa, Japan)           | <i>same as on the left</i>                                                | 2015100<br>(08 Jan 2016)         |
| 36 | Osaki Internal and Respiratory Clinic<br>(Kitakyushu, Fukuoka, Japan)        | Hoshikuma Hihuka Allergy Clinic<br>(Fukuoka, Fukuoka, Japan)              | (22 Dec 2015)*                   |
| 37 | National Center for Geriatrics and Gerontology<br>(Obu, Aichi, Japan)        | <i>same as on the left</i>                                                | 15108<br>(01 Feb 2016)           |
| 38 | Teine Keijinkai Clinic<br>(Sapporo, Hokkaido, Japan)                         | <i>same as on the left</i>                                                | TKC2016-01<br>(12 Feb 2016)      |
| 39 | NHO Toneyama Hospital<br>(Toyonaka, Osaka, Japan)                            | <i>same as on the left</i>                                                | 27-52<br>(29 Feb 2016)           |
| 40 | Nihonbashi Sakura Clinic<br>(Chuo-ku, Tokyo, Japan)                          | <i>same as on the left</i>                                                | (29 Jan 2016)*                   |
| 41 | Mazda Hospital<br>(Aki-gun, Hiroshima, Japan)                                | Koyasu Neurosurgical Clinic<br>(Yokohama, Kanagawa, Japan)                | (29 Aug 2016)*                   |
| 42 | NHO Tenryu Hospital<br>(Hamamatsu, Shizuoka, Japan)                          | <i>same as on the left</i>                                                | (14 Sep 2016)*                   |
| 43 | NHO Himeji Medical Center<br>(Himeji, Hyogo, Japan)                          | <i>same as on the left</i>                                                | 321<br>(07 Oct 2016)             |
| 44 | Shimane University Hospital<br>(Izumo, Shimane, Japan)                       | <i>same as on the left</i>                                                | 28-8<br>(15 Sep 2016)            |

\* No reference number on the approval letter from IRB

IRB, Institutional Review Board
